# Supplementary material for: UCH-L1-mediated Down-regulation of Estrogen Receptor α Contributes to Insensitivity to Endocrine Therapy for Breast Cancer
Source: Theranostics. 2020 Jan 1;10(4):1833–48. doi: 10.7150/thno.39814 (PMC6993235; doi:10.7150/thno.39814)
Supplement: Supplementary file 1 — Supplementary figures and table. [file thnov10p1833s1.pdf]

**Supplementary Table S1. The results of IHC analysis for breast tumor samples**

| Intrinsic<br>subtypes | UCHL1    |          | Row Totals | Person X <sup>2</sup> | p          |
|-----------------------|----------|----------|------------|-----------------------|------------|
|                       | Positive | Negative |            |                       |            |
| Luminal A             | 2        | 45       | 47         | 32.338                | <0.0001*** |
| Luminal B             | 2        | 46       | 48         |                       |            |
| HER2 positive         | 0        | 45       | 45         |                       |            |
| Triple negative       | 10       | 19       | 29         |                       |            |
| Column Totals         | 14       | 145      | 159        |                       |            |

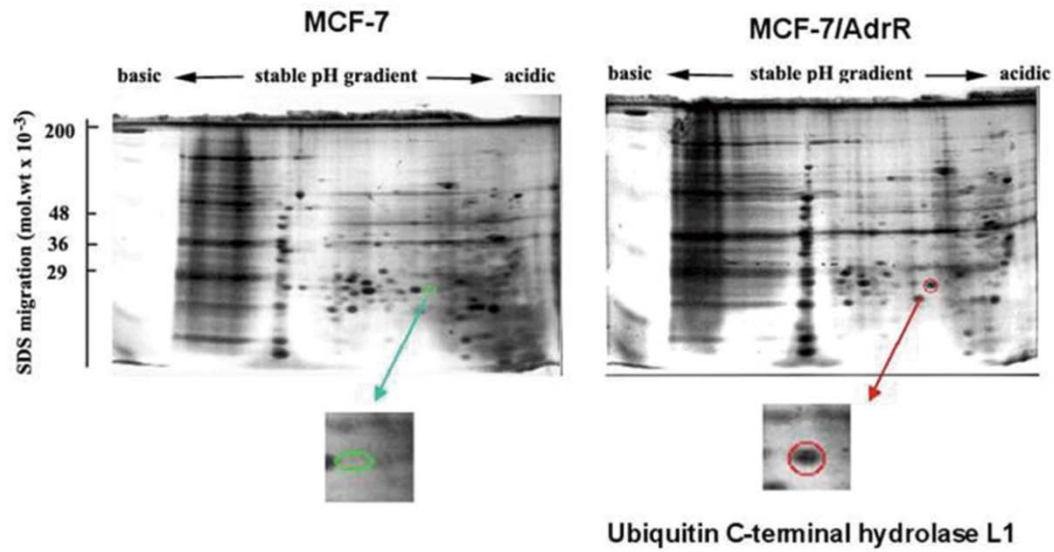

**Figure S1. UCH-L1 is overexpressed in MCF-7/AdrR cells.** Related to Figure 1. Equal amount of proteins from cell lysates of both MCF-7 and MCF-7/AdrR cell lines were mapped using two-dimensional gel electrophoresis. Proteins were visualized with silver staining. A protein spot with molecular weight of 30 kD and PI of 5.33 was abundant in MCF-7/AdrR cells, but not detectable in MCF-7 cells. The NH<sub>2</sub>-terminal sequencing of this protein revealed 100% homology with UCH-L1.

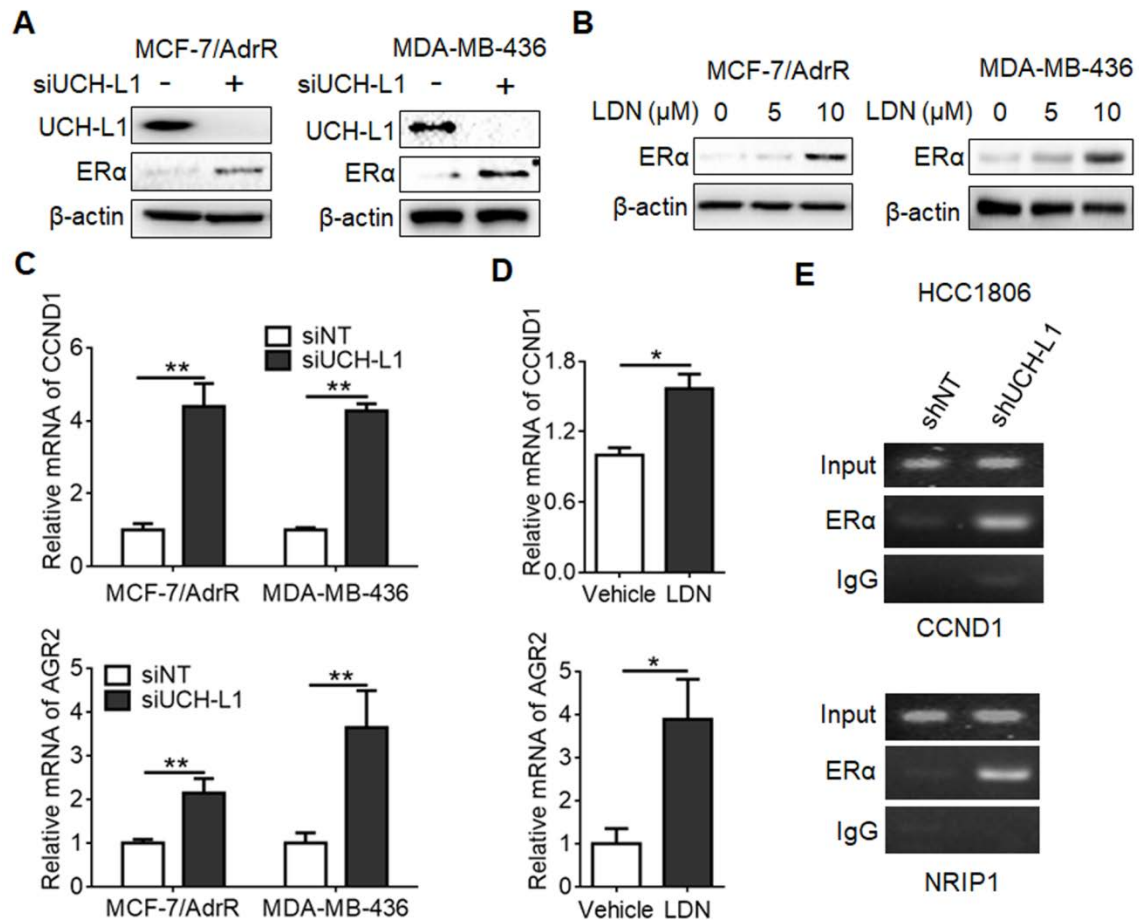

**Figure S2. Effects of UCH-L1 siRNA or small molecule inhibitor on ERα in ERα (-) breast cancer cells.** Related to Figure 2. MCF-7/AdrR or MDA-MB-436 cells were transfected with a non-targeting siRNA or an UCH-L1 siRNA for 72h (**A**), or were treated with UCH-L1 inhibitor LDN with the indicated concentrations for 24h (**B**). The expressions of UCH-L1 and ERα were measured by western blot. β-actin was used as a loading control. MCF-7/AdrR or MDA-MB-436 cells were transfected with a non-targeting siRNA or an UCH-L1 siRNA for 72h (**C**), MDA-MB-436 cells were treated with 10 μM LDN for 24h (**D**). The mRNA levels of CCND1 and AGR2 were analyzed by real-time PCR (Mean ± s.d., n=3 biologically independent experiments. \*,  $p < 0.05$ ; \*\*,  $p < 0.01$ ).

<0.01). **(E)** Chromatin immunoprecipitation assay analyzing the binding of ER $\alpha$  to the CCND1/NRIP1 promoter regions in the presence of 10nM E2 for 24 hours. Samples were amplified by PCR and followed by analyzing by agarose gel electrophoresis. Immunoglobulin G (IgG) was used as a negative control.

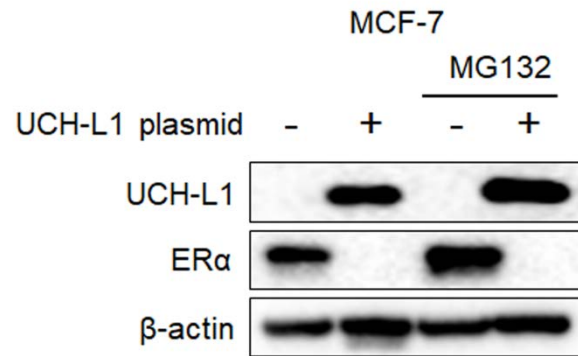

**Figure S3. UCH-L1 does not affect the degradation of ERα protein.**

Related to Figure 3. MCF-7 cells were transfected with a control plasmid or a myc-his-UCH-L1 plasmid, followed by treatment with 20μM MG132 for 4h. The expressions of UCH-L1 and ERα were measured by western blot. β-actin was used as a loading control.

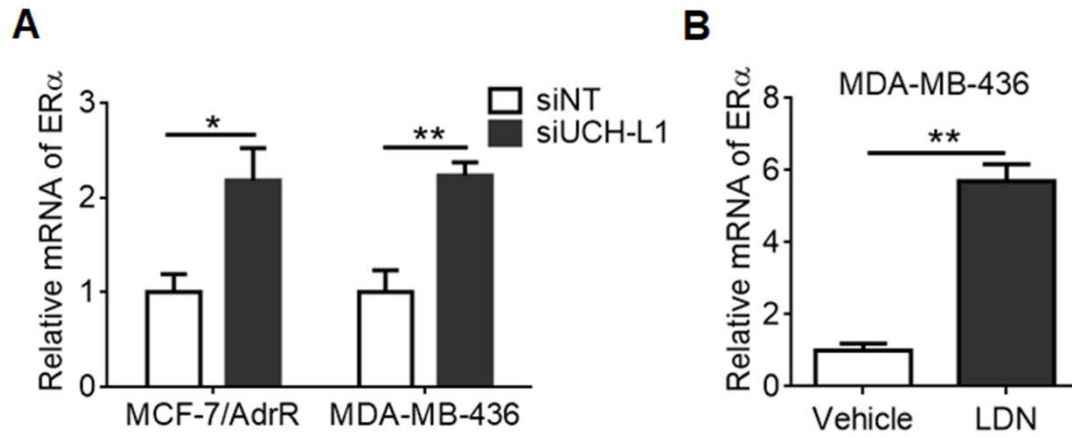

**Figure S4. Effect of UCH-L1 on the transcription of ER $\alpha$  gene.**

Related to Figure 3. **(A)** MCF-7/AdrR or MDA-MB-436 cells were transfected with a non-targeting siRNA or an UCH-L1 siRNA for 72h. **(B)** MDA-MB-436 cells were treated with 10  $\mu$ M LDN for 24h. The ER $\alpha$  mRNA level was analyzed by real-time PCR. Results shown are Mean  $\pm$  s.d., n=3 biologically independent experiments. \*,  $p < 0.05$ ; \*\*,  $p < 0.01$ .

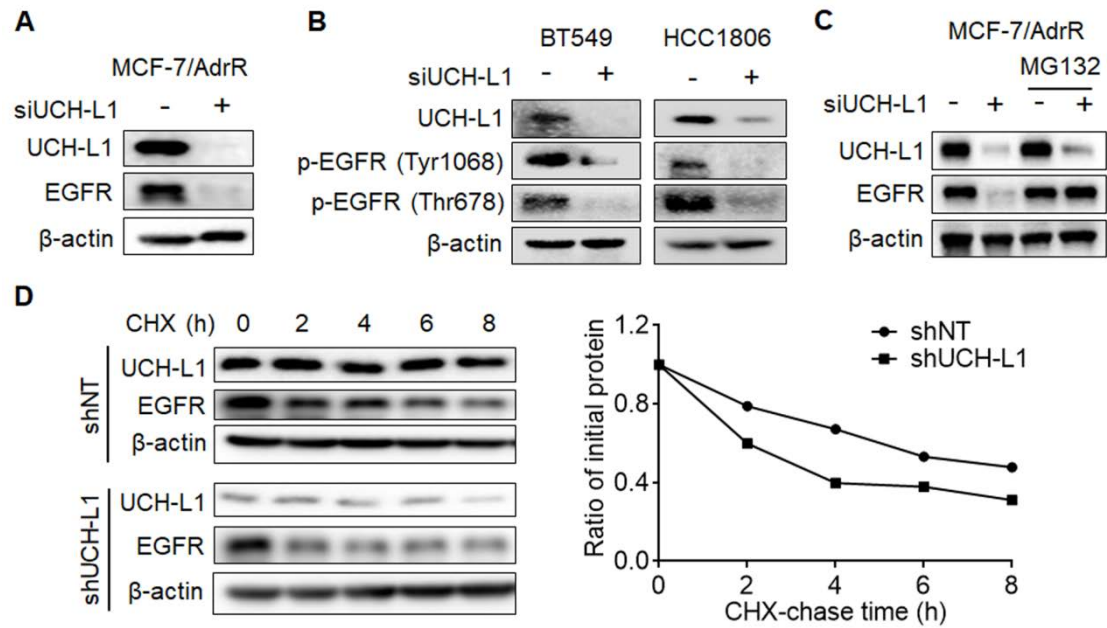

**Figure S5. Inhibition of UCH-L1 increases the degradation of EGFR.**

Related to Figure 4. **(A)** MCF-7/AdrR cells were transfected with a non-targeting siRNA or an UCH-L1 siRNA. The expressions of UCH-L1 and EGFR were measured by western blot.  $\beta$ -actin was used as a loading control. **(B)** BT549 or HCC1806 cells were transfected with a non-targeting siRNA or an UCH-L1 siRNA for 72h. The expressions of UCH-L1 and p-EGFR at Y1068 and Thr678 were examined by western blot.  $\beta$ -actin was used as a loading control. **(C)** MCF-7/AdrR cells were transfected with a non-targeting siRNA or an UCH-L1 siRNA, followed by treatment with 20 $\mu$ M MG132 for 4h. Expressions of UCH-L1 and EGFR were examined by western blot.  $\beta$ -actin was used as a loading control. **(D)** MCF-7/AdrR cells were transfected with a non-targeting shRNA or an UCH-L1 shRNA, and then subjected to cycloheximide (10 $\mu$ g/ml) chase at the indicated time. The expressions of UCH-L1 and

EGFR were measured by western blot.  $\beta$ -actin was used as a loading control.

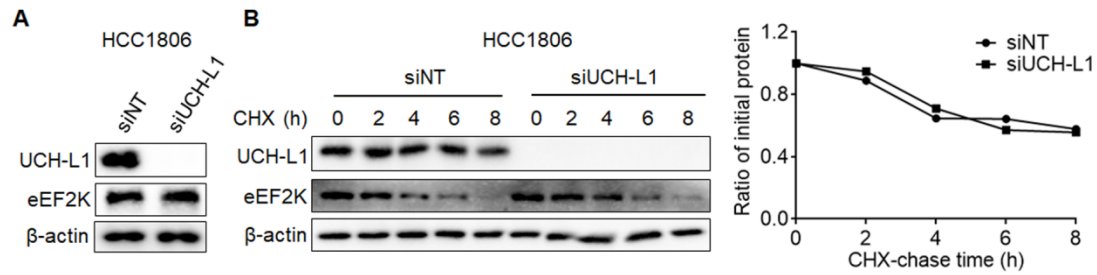

**Figure S6. UCH-L1 has no effect on eEF2K protein expression and degradation.** Related to Figure 4. **(A)** HCC1806 cells were transfected with a non-targeting siRNA or an UCH-L1 siRNA for 72h. The expressions of UCH-L1 and eEF2K were measured by western blot.  $\beta$ -actin was used as a loading control. **(B)** HCC1806 cells were transfected with a non-targeting siRNA or an UCH-L1 siRNA, and then subjected to cycloheximide (10 $\mu$ g/ml) chase at the indicated time. Expressions of UCH-L1 and eEF2K were measured by western blot.  $\beta$ -actin was used as a loading control.

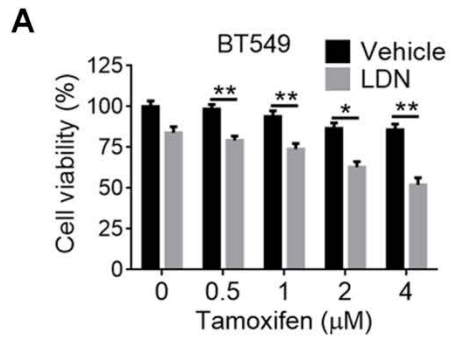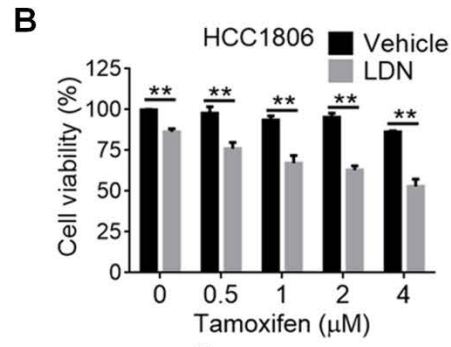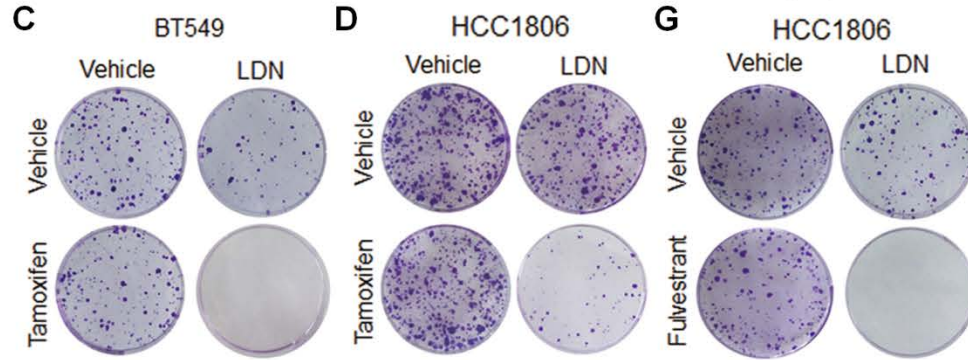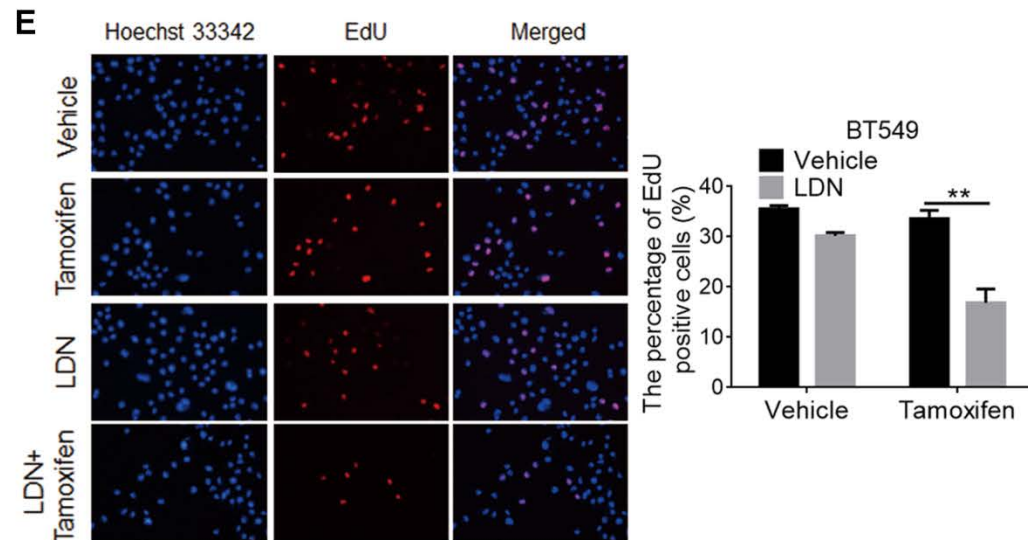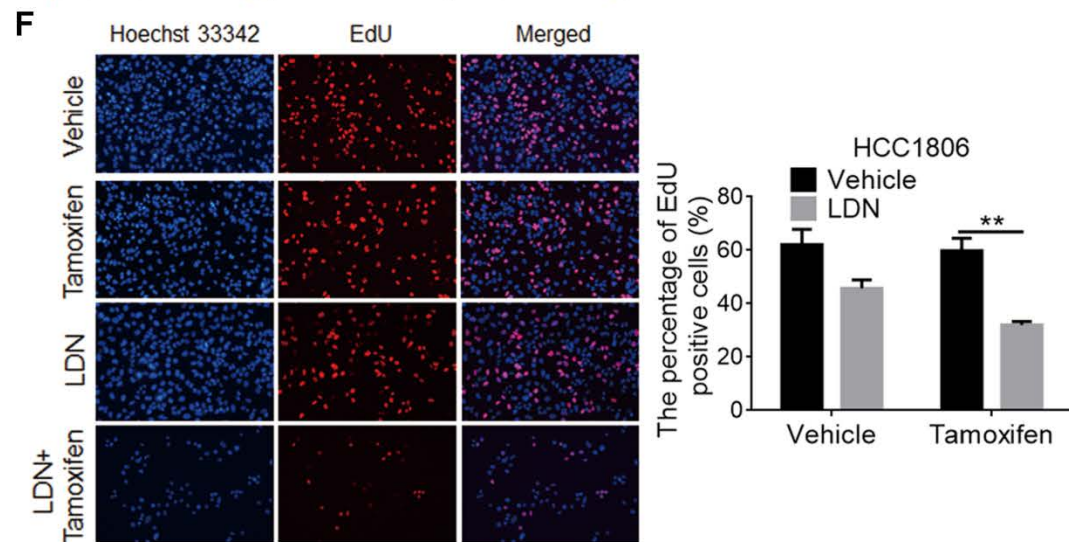

**Figure S7. Inhibition of UCH-L1 sensitizes ER $\alpha$  (-) breast cancer cells to tamoxifen and fulvestrant.** Related to Figure 6. **(A, B)** BT549 or HCC1806 cells were treated with tamoxifen for 72h in the presence or absence of 10 $\mu$ M LDN. Cell viability was measured using CCK-8 assay. **(C, D)** Colony formation of BT549 or HCC1806 cells after treatment with 4 $\mu$ M tamoxifen in the presence or absence of 10 $\mu$ M LDN. **(E, F)** BT549 or HCC1806 cells were treated with 4 $\mu$ M tamoxifen for 72h in the presence or absence of 10 $\mu$ M LDN. Cells proliferation capacity was detected by EdU. Magnification,  $\times 200$ . Results shown are Mean  $\pm$  s.d., n=3. \*,  $p < 0.05$ ; \*\*,  $p < 0.01$ . **(G)** Colony formation of HCC1806 cells after treatment with 400nM fulvestrant in the presence or absence of 10 $\mu$ M LDN.
